# Supplementary material for: Positive magnetic resonance angiography using ultrafine ferritin-based iron oxide nanoparticles
Source: Royal Society of Chemistry journal article supplement (doi:10.1039/c8nr06812g), 2018-11-28
Supplement: c8nr06812g1.pdf [file c8nr06812g1.pdf]

## LIST OF SUPPORTING MOVIES

**Movie S1.** M-HFn enhanced MRA of mouse at different time with a dose of 0.54 mM Fe/kg body weight.

**Movie S2.** MRA of mouse by using Gd-DTPA with a clinical dose of 0.2 mL/kg body weight.

**Movie S3.** MRA of head and neck of mouse by using M-HFn.

**Movie S4.** MRA of head and neck of mouse by using Gd-DTPA.

**Movie S5.** MRA of brain of rat by using M-HFn.
